# Supplementary material for: Genome-Wide Analysis of the AAAP Gene Family in Populus and Functional Analysis of PsAAAP21 in Root Growth and Amino Acid Transport
Source: MDPI journal article supplement (doi:10.3390/ijms24010624), 2022-12-30
Supplement: s1 [file s1]

### **Supplementary Table**

**Table S1** Information of *PtrAAAP* genes.

**Table S2.** Collinearity relationship of AAAP genes among *A. thaliana*, *P. trichocarpa*, and *O. sativa*.

**Table S3.** Quantitative trait locus (QTL) information for the investigated traits in the F1 population of *PtrAAAPs*.

**Table S4.** Primer sequences of *PtrAAAPs* for qPCR analysis and vector construction.

### **Supplementary Figure**

**Figure S1.** Statistics of cis-acting elements of *PsAAAPs*, the cis-acting elements in the 2000 bp region upstream of *PtrAAAPs* are divided into 3 groups according to their function, the number of each cis-acting element of *PtrAAAPs* was marked in figure.

**Figure S2.** Stem phenotype of transgenic lines treated with amino acids.

**Figure S3.** Correlation analysis of *AAAP21* expression and amino acid content of hybrid parents. X\_ represents xylem and p\_ represents phloem. (\*  $P < 0.05$ , \*\* $P < 0.01$ , \*\*\* $P < 0.001$ ).

**Figure S4.** Yeast two-hybrid assay.

**Figure S5.** Subcellular localization of *PsAAAP21*. OsART1 and HDEL are markers of the nucleus and endoplasmic reticulum, respectively.
