# Supplementary material for: Genome-Wide Analysis of the AAAP Gene Family in Populus and Functional Analysis of PsAAAP21 in Root Growth and Amino Acid Transport
Source: Int J Mol Sci. 2022 Dec 30;24(1):624. doi: 10.3390/ijms24010624 (PMC9820651; doi:10.3390/ijms24010624)
Supplement: Supplementary file 1 [file ijms-24-00624-s001.zip]

Archive with 10 entries (10 files):
- Figure S1.tif
- Figure S2.jpg
- Figure S3. Correlation analysis of AAAP21 expression and amino acid content of hybrid parents.jpg
- Figure S4.jpg
- Figure S5.jpg
- Supplementary materials.pdf
- Table S1.xlsx
- Table S2.xlsx
- Table S3.xlsx
- Table S4.xlsx
