# Supplementary material for: Genome-Wide Analysis of the AAAP Gene Family in Populus and Functional Analysis of PsAAAP21 in Root Growth and Amino Acid Transport
Source: Int J Mol Sci. 2022 Dec 30;24(1):624. doi: 10.3390/ijms24010624 (PMC9820651; doi:10.3390/ijms24010624)
Supplement: Supplementary file 1 [file ijms-24-00624-s001.zip › Table S1.xlsx]

## Sheet: Sheet1
Table S1 Information of PtrAAAP genes
Name	ID	Protein				Exon	Subcellular localization	Signal peptides
		Length	Mw	pI	GRAVY
PtrAAAP1	Potri.001G093600	393	43282.4	8.89	0.675	7	Extracellular	No
PtrAAAP2	Potri.001G204400	468	51008.9	5.45	0.683	2	Extracellular	No
PtrAAAP3	Potri.001G335200	449	50229.3	9.1	0.465	8	Plasma membrane	No
PtrAAAP4	Potri.001G335300	360	40438.2	9.2	0.643	6	Plasma membrane	No
PtrAAAP5	Potri.001G469900	127	13511.5	4.45	0.456	3	Plasma membrane	No
PtrAAAP6	Potri.001G470000	458	50662.3	8.63	0.536	7	Nucleus, Vacuole or Membrane	No
PtrAAAP7	Potri.001G470200	335	37425.8	8.66	0.46	7	Nucleus, Vacuole or Membrane	No
PtrAAAP8	Potri.002G012900	526	58350.9	9.15	0.578	5	Plasma membrane	No
PtrAAAP9	Potri.002G079400	425	46650.9	8.98	0.539	5	Nucleus, Vacuole or Membrane	No
PtrAAAP10	Potri.002G079500	480	52786.9	9.07	0.463	5	Nucleus, Vacuole or Membrane	No
PtrAAAP11	Potri.002G079700	413	45398.5	9.13	0.521	5	Nucleus, Vacuole or Membrane	No
PtrAAAP12	Potri.002G087000	465	52828.9	8.89	0.466	8	Cytoplasm and Membrane	No
PtrAAAP13	Potri.002G112100	487	53707.7	9.29	0.403	8	Nucleus, Vacuole or Membrane	No
PtrAAAP14	Potri.002G114300	455	50025.5	6.25	0.6	5	Extracellular	No
PtrAAAP15	Potri.002G226500	74	7920.24	9.69	0	1	Extracellular	No
PtrAAAP16	Potri.002G233100	363	39525.6	8.86	0.62	3	Extracellular	No
PtrAAAP17	Potri.002G233200	409	44008	9.16	0.764	3	Extracellular	No
PtrAAAP18	Potri.003G011900	497	54147.6	5.75	0.605	1	Extracellular	No
PtrAAAP19	Potri.003G029700	498	54290.7	5.75	0.595	1	Extracellular	No
PtrAAAP20	Potri.003G138100	453	49669.9	8.96	0.622	7	Extracellular	No
PtrAAAP21	Potri.004G111400	460	50001.8	8.41	0.625	5	Extracellular	No
PtrAAAP22	Potri.004G172800	491	55405.8	8.97	0.367	8	Cytoplasm and Membrane	No
PtrAAAP23	Potri.004G181000	434	47406.6	9.67	0.707	5	Plasma membrane	No
PtrAAAP24	Potri.004G181100	507	55222.1	8.85	0.576	5	Plasma membrane	No
PtrAAAP25	Potri.004G181200	527	58468	9.86	0.293	5	Plasma membrane	No
PtrAAAP26	Potri.004G189100	116	12880.4	11.24	0.713	1	Extracellular	No
PtrAAAP27	Potri.004G206800	427	46461	6.43	0.775	1	Extracellular	No
PtrAAAP28	Potri.005G068900	494	54695.1	8.9	0.415	6	Nucleus, Vacuole or Membrane	No
PtrAAAP29	Potri.005G102300	426	46528.1	6.59	0.781	1	Extracellular	No
PtrAAAP30	Potri.005G174000	464	52583.5	8.95	0.487	8	Cytoplasm and Membrane	No
PtrAAAP31	Potri.005G181500	484	52936.9	9.01	0.477	5	Nucleus, Vacuole or Membrane	No
PtrAAAP32	Potri.005G181600	487	53336.3	9.1	0.386	5	Nucleus, Vacuole or Membrane	No
PtrAAAP33	Potri.005G219300	451	50074.2	9.01	0.365	7	Extracellular	No
PtrAAAP34	Potri.006G038700	424	46249.5	4.94	0.131	7	Extracellular	No
PtrAAAP35	Potri.006G098300	510	57417.2	8.58	0.42	7	Cytoplasm and Membrane	Yes
PtrAAAP36	Potri.006G235600	73	8535.33	9.87	0.642	1	Nucleus, Vacuole or Membrane	No
PtrAAAP37	Potri.006G235900	116	12508.5	4.75	0.505	3	Nucleus, Vacuole or Membrane	No
PtrAAAP38	Potri.006G236000	481	52407.3	9.18	0.433	7	Nucleus, Vacuole or Membrane	No
PtrAAAP39	Potri.006G236100	143	16143.3	9.55	0.651	1	Nucleus, Vacuole or Membrane	No
PtrAAAP40	Potri.007G100100	494	54467.9	8.88	0.461	6	Nucleus, Vacuole or Membrane	No
PtrAAAP41	Potri.008G026600	457	49588.4	8.58	117.13	7	Extracellular	No
PtrAAAP42	Potri.008G026700	458	50202.3	9.24	0.647	7	Extracellular	No
PtrAAAP43	Potri.008G036300	554	60348.7	5.46	0.312	11	Extracellular	No
PtrAAAP44	Potri.008G062900	446	48792.2	9.3	0.596	7	Extracellular	No
PtrAAAP45	Potri.008G066400	332	37470.3	6.58	0.32	6	Cytoplasm and Membrane	No
PtrAAAP46	Potri.008G086500	412	44984.6	8.63	0.8	3	Extracellular	No
PtrAAAP47	Potri.008G118000	435	48545.1	9.06	0.457	8	Plasma membrane	No
PtrAAAP48	Potri.008G179000	439	49227.2	9.06	0.556	7	Nucleus, Vacuole or Membrane	No
PtrAAAP49	Potri.009G085000	473	51574.2	8.19	0.543	7	Nucleus, Vacuole or Membrane	No
PtrAAAP50	Potri.009G132100	491	55384.9	8.96	0.392	8	Plasma membrane	No
PtrAAAP51	Potri.009G133600	511	56656.2	8.96	0.39	8	Nucleus, Vacuole or Membrane	No
PtrAAAP52	Potri.009G140800	515	57081.3	9.73	0.318	6	Plasma membrane	No
PtrAAAP53	Potri.009G149900	411	45070.7	8.55	0.409	8	Extracellular	No
PtrAAAP54	Potri.009G167900	428	46562.4	8.72	0.807	1	Extracellular	No
PtrAAAP55	Potri.010G055800	439	49135.9	8.57	0.563	7	Plasma membrane	No
PtrAAAP56	Potri.010G128300	435	48600.2	9.1	0.446	8	Plasma membrane	No
PtrAAAP57	Potri.010G136600	188	21190.9	4.95	0.754	2	Extracellular	No
PtrAAAP58	Potri.010G169000	412	44996.7	8.96	0.776	3	Extracellular	No
PtrAAAP59	Potri.010G181800	455	49521.9	9.02	0.853	5	Extracellular	No
PtrAAAP60	Potri.010G191000	473	53318.2	8.44	0.419	8	Plasma membrane	No
PtrAAAP61	Potri.010G194600	383	42229.8	9.63	0.679	6	Extracellular	No
PtrAAAP62	Potri.010G221900	438	47490.7	8.33	0.423	6	Extracellular	No
PtrAAAP63	Potri.010G226000	554	60390.8	5.31	0.316	11	Extracellular	No
PtrAAAP64	Potri.010G233800	118	12934.9	8.84	0.262	1	Extracellular	No
PtrAAAP65	Potri.010G233900	271	29590.2	9.25	0.666	5	Extracellular	No
PtrAAAP66	Potri.011G167000	301	33340.3	8.84	0.695	4	Plasma membrane	No
PtrAAAP67	Potri.011G167200	457	50653.5	8.91	0.483	7	Plasma membrane	No
PtrAAAP68	Potri.011G167300	471	51735.4	8.5	0.44	7	Plasma membrane	No
PtrAAAP69	Potri.011G167500	469	51669.4	8.87	0.419	7	Plasma membrane	No
PtrAAAP70	Potri.013G103500	406	44923.2	9.46	0.624	5	Plasma membrane	No
PtrAAAP71	Potri.014G036500	521	57612.6	9.35	0.463	5	Plasma membrane	No
PtrAAAP72	Potri.014G146700	480	52344.6	8.86	0.554	3	Extracellular	No
PtrAAAP73	Potri.014G182100	87	10006	9.34	0.79	1	Plasma membrane	No
PtrAAAP74	Potri.014G182400	108	11935.5	9.97	0.794	1	Plasma membrane	No
PtrAAAP75	Potri.015G091600	423	47476.2	9.35	0.569	7	Plasma membrane	No
PtrAAAP76	Potri.016G064500	422	45282.1	5.74	0.697	3	Extracellular	No
PtrAAAP77	Potri.016G100300	532	57282.5	5.13	0.472	10	Extracellular	No
PtrAAAP78	Potri.016G113600	422	47826.8	8.08	0.416	6	Plasma membrane	No
PtrAAAP79	Potri.017G083500	335	36810.8	8.5	0.774	2	Extracellular	No
PtrAAAP80	Potri.017G083700	430	47122.5	8.3	0.745	3	Extracellular	No
PtrAAAP81	Potri.017G106300	460	50101	8.22	0.655	5	Extracellular	No
PtrAAAP82	Potri.018G099700	395	42432.6	9.47	0.806	3	Extracellular	No
PtrAAAP83	Potri.T152100	466	51279.1	9.28	0.432	6	Nucleus, Vacuole or Membrane	No
