# Supplementary material for: Genome-Wide Analysis of the AAAP Gene Family in Populus and Functional Analysis of PsAAAP21 in Root Growth and Amino Acid Transport
Source: Int J Mol Sci. 2022 Dec 30;24(1):624. doi: 10.3390/ijms24010624 (PMC9820651; doi:10.3390/ijms24010624)
Supplement: Supplementary file 1 [file ijms-24-00624-s001.zip › Table S2.xlsx]

## Sheet: Sheet1
Table S2. Collinearity relationship of AAAP genes among A. thaliana, P. trichocarpa, and O. sativa
Collinearity relationship with A. thaliana			Collinearity relationship with O. sativa
A. thaliana	P. trichocarpa		O. sativa	P. trichocarpa
AT5G41800.1	Potri.001G093600	PtrAAAP1	Os02t0722400-01	Potri.001G469900	PtrAAAP5
AT3G01760.1	Potri.001G335200	PtrAAAP3	Os04t0470700-01	Potri.001G469900	PtrAAAP5
AT5G40780.1	Potri.001G335200	PtrAAAP3	Os04t0562100-01	Potri.002G012900	PtrAAAP8
AT4G35180.1	Potri.002G012900	PtrAAAP8	Os07t0134000-02	Potri.002G112100	PtrAAAP13
AT1G10010.2	Potri.002G112100	PtrAAAP13	Os01t0621200-00	Potri.003G138100	PtrAAAP20
AT1G58360.1	Potri.002G112100	PtrAAAP13	Os03t0244600-01	Potri.004G172800	PtrAAAP22
AT5G41800.1	Potri.003G138100	PtrAAAP20	Os01t0857400-01	Potri.004G189100	PtrAAAP26
AT3G30390.3	Potri.004G111400	PtrAAAP21	Os01t0882800-01	Potri.005G181500	PtrAAAP31
AT5G38820.2	Potri.004G111400	PtrAAAP21	Os10t0415100-01	Potri.005G219300	PtrAAAP33
AT2G21050.1	Potri.004G172800	PtrAAAP22	Os01t0856500-01	Potri.006G098300	PtrAAAP35
AT4G35180.1	Potri.004G181000	PtrAAAP23	Os05t0447200-01	Potri.006G098300	PtrAAAP35
AT4G38250.1	Potri.004G206800	PtrAAAP27	Os12t0244400-01	Potri.008G179000	PtrAAAP48
AT1G77380.1	Potri.005G068900	PtrAAAP28	Os03t0244600-01	Potri.009G132100	PtrAAAP50
AT5G09220.1	Potri.005G068900	PtrAAAP28	Os12t0244400-01	Potri.010G055800	PtrAAAP55
AT5G63850.1	Potri.005G068900	PtrAAAP28	Os02t0727100-01	Potri.010G136600	PtrAAAP57
AT1G77690.1	Potri.005G174000	PtrAAAP30	Os06t0275800-01	Potri.010G136600	PtrAAAP57
AT1G77380.1	Potri.005G181500	PtrAAAP31	Os01t0825800-01	Potri.010G181800	PtrAAAP59
AT1G44100.1	Potri.005G181600	PtrAAAP32	Os01t0856500-01	Potri.010G191000	PtrAAAP60
AT2G41190.1	Potri.006G038700	PtrAAAP34	Os05t0447200-01	Potri.010G191000	PtrAAAP60
AT2G38120.1	Potri.006G098300	PtrAAAP35	Os06t0275800-01	Potri.017G106300	PtrAAAP81
AT5G01240.1	Potri.006G098300	PtrAAAP35
AT1G77380.1	Potri.007G100100	PtrAAAP40
AT5G09220.1	Potri.007G100100	PtrAAAP40
AT5G63850.1	Potri.007G100100	PtrAAAP40
AT2G39890.2	Potri.008G062900	PtrAAAP44
AT3G55740.1	Potri.008G062900	PtrAAAP44
AT3G28960.3	Potri.008G086500	PtrAAAP46
AT1G24400.1	Potri.008G179000	PtrAAAP48
AT1G67640.1	Potri.008G179000	PtrAAAP48
AT3G01760.1	Potri.008G179000	PtrAAAP48
AT2G21050.1	Potri.009G132100	PtrAAAP50
AT4G38250.1	Potri.009G167900	PtrAAAP54
AT1G24400.1	Potri.010G055800	PtrAAAP55
AT1G67640.1	Potri.010G055800	PtrAAAP55
AT3G28960.3	Potri.010G169000	PtrAAAP58
AT2G40420.1	Potri.010G181800	PtrAAAP59
AT3G56200.1	Potri.010G181800	PtrAAAP59
AT2G38120.1	Potri.010G191000	PtrAAAP60
AT5G01240.1	Potri.010G191000	PtrAAAP60
AT1G47670.1	Potri.014G036500	PtrAAAP71
AT3G11900.1	Potri.016G064500	PtrAAAP76
AT5G02170.1	Potri.016G100300	PtrAAAP77
AT3G30390.3	Potri.017G106300	PtrAAAP81
AT5G38820.2	Potri.017G106300	PtrAAAP81
