# Supplementary material for: Genome-Wide Analysis of the AAAP Gene Family in Populus and Functional Analysis of PsAAAP21 in Root Growth and Amino Acid Transport
Source: Int J Mol Sci. 2022 Dec 30;24(1):624. doi: 10.3390/ijms24010624 (PMC9820651; doi:10.3390/ijms24010624)
Supplement: Supplementary file 1 [file ijms-24-00624-s001.zip › Table S3.xlsx]

## Sheet: Sheet1
Table S3. Quantitative trait locus (QTL) information for the investigated traits in the F1 population of PtrAAAPs.
QTL code	LOD	Genetic distance	Chr	Gene start	Gene end	Candidate gene	Homologous gene	Phytozome annotation
qRDW-LG8-6	3	27.461	scaffold_555	12102	14105	Potri.T152100	AT1G77380	amino acid permease 3
qRDW-LG14-2	3.29	97.932	Chr04	10083213	10088454	Potri.004G111400	AT3G30390	Transmembrane amino acid transporter family protein
qLN-LG10-1	3.12	48.46	Chr10	18607727	18613071	Potri.010G191000	AT2G38120	Transmembrane amino acid transporter family protein
qLN-LG10-2	3	48.463	Chr10	18607727	18613071	Potri.010G191000	AT2G38120	Transmembrane amino acid transporter family protein
qLN-LG10-3	3.5	48.466	Chr10	18607727	18613071	Potri.010G191000	AT2G38120	Transmembrane amino acid transporter family protein
qLN-LG10-4	3.23	52.626	Chr10	18607727	18613071	Potri.010G191000	AT2G38120	Transmembrane amino acid transporter family protein
