# Supplementary material for: Genome-Wide Analysis of the AAAP Gene Family in Populus and Functional Analysis of PsAAAP21 in Root Growth and Amino Acid Transport
Source: Int J Mol Sci. 2022 Dec 30;24(1):624. doi: 10.3390/ijms24010624 (PMC9820651; doi:10.3390/ijms24010624)
Supplement: Supplementary file 1 [file ijms-24-00624-s001.zip › Table S4.xlsx]

## Sheet: Sheet1
Table S4. Primer sequences of PtrAAAPs for qPCR analysis and vector construction.
Primer name	Sequence(5'-3')
qATLa21-F	GCCAACTTTGACACCAACCT
qATLa21-R	AAGCAATAAGCCCAATGGTG
qATLa81-F	ATTAGTGTGCTGCGTTGTGC
qATLa81-R	TTGGCACAAATAGCATGAGC
qANT54-F	GGTTTTGGGGTGGAAGGTAT
qANT54-F	CACCCTTTCCAGCTCATCTC
qANT29-F	CGGTACCTGGTCTTCCTTGA
qANT29-R	GCACCACCAATCTATGAGCA
qATLb46-F	CTGCTTGTGCTACCTCAGGA
qATLb46-R	TCAACCCTCAAGCTGCTTTT
qATLb58-F	TGTTGTTACCCTGCTTGTGC
qATLb58-R	TTCGACTTGCATGATCTTCG
qLHT56-F	GACTCAATTTCCCACCAGGA
qLHT56-R	CGAATATGCAAGCCCAATTT
qLHT71-F	TTTTAGCTTGGCCTTCTCCA
qLHT71-R	TACCCCCATTCAACTTCCAA
qProT44-F	TTCTTCGGCCTCATGTCAAT
qProT44-R	TGTCCGGATGAAGATGTGAA
qProT61-F	TTTTCGGCCTTATGTCCATT
qProT61-R	CTTCGTTGATTGCGGAAAAT
qGAT20-F	TCTGCTGATGTGAAGCAAGG
qGAT20-R	GAAGCATTGGAAGGACGAAA
qGAT42-F	TGGAGACATCATGGCATTGT
qGAT42-R	CGTCAGCGAACAAGCTGTAA
qAAP28-F	ATGGCTTGCCTTGTGATTTC
qAAP28-R	CAAACACCACCCACTTGAGA
qAAP68-F	TTGCCAACATTGAGAAGTCG
qAAP68-R	CCCTCCCATCACTCCAATAA
qAUX30-F	GGTGGTATGGGTTTTTGTCG
qAUX30-R	GGGGGAAAGGTTACAAATGC
qAUX78-F	TCGCAAAGTGCTATCAATGC
qAUX78-R	ATCCAGCACACATCACATGG
PtrActin_F	AAACTGTAATGGTCCTCCCTCCG
PtrActin_R	GCATCATCACAATCACTCTCCGA
BD_AAAP19-F	ggccgaattcccggggATGACAACTGGAAATATTGCTTCGAAG
BD_AAAP19-R	ccgctgcaggtcgacggatccTCATTCACGAGGCGACGGGTTC
AAAP19_-F	ATGACAACTGGAAATATTGCTTCGAAG
AAAP19-R	TCATTCACGAGGCGACGGGTTC
AAAP19_Ps-GW-F	GGGGACAACTTTGTACAAAAAAGTTGGAATGACAACTGGAAATATTGCTTCGAAG
AAAP19_Ps-GW-R	GGCGGCCGCACAACTTTGTACAAGAAAGTTGGGTATCATTCACGAGGCGACGGGTTC
AAAP_Ri_GW-F	GGGGACAACTTTGTACAAAAAAGTTGGAATGACAACTGGAAATATTGCTTCGA
AAAP_Ri_GW-R	GGCGGCCGCACAACTTTGTACAAGAAAGTTGGGTACCCCATAAGAAGCACACTTCCCTG
Rec1_SNF4-F	TGGCCATTATGGCCCGGGATGTTTGGTTCTGGTTCCAGTACTG
Rec1_SNF4-R	GACATGTTTTTTCCCGGGCTAAGCTACCCCCAACAGAAACCTGA
Rec1_LST8-F	TGGCCATTATGGCCCGGGATGACACAGCCATCAGTAATACTTG
Rec1_LST81-R	GACATGTTTTTTCCCGGGTCAACTTGAAGAGGGTTCTGCTCCA
Rec1_MAF1-F	TGGCCATTATGGCCCGGGATGAAGTTCTTAGAATATACACCAC
Rec1_MAF1-R	GACATGTTTTTTCCCGGGTTACATGTCCATGTCATCAAATATT
